# Supplementary material
Source: PubMed Central journal article supplement (PMC1334681)

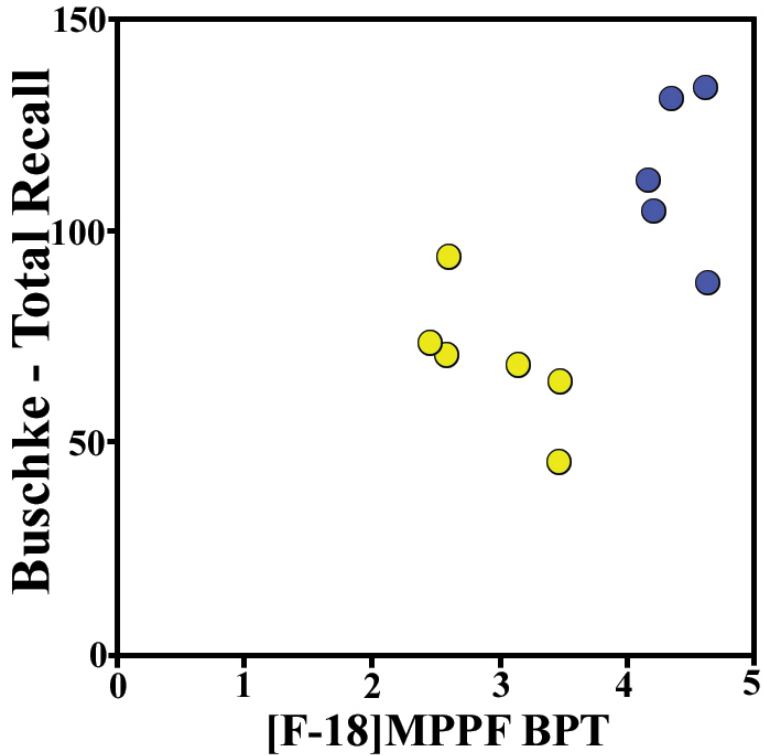

Supplement: pnas_0510237103_1.pdf [file pnas_0510237103_1.pdf]

**CONTROL**

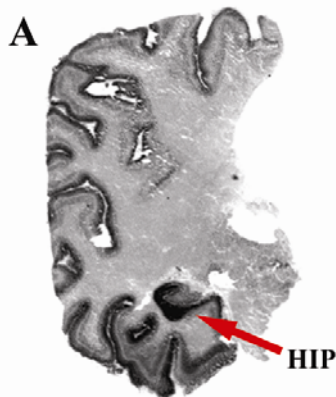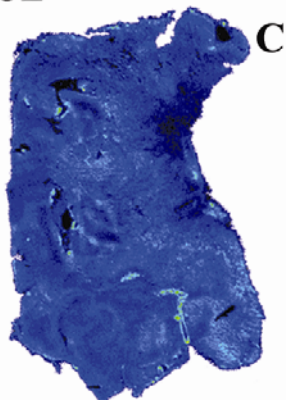

**[F-18]MPPF**

**[F-18]FDDNP**

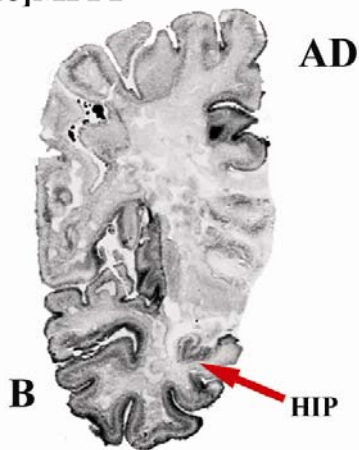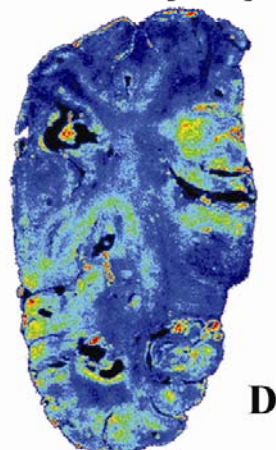

min  max

min  max

Supplement: pnas_0510237103_2.pdf [file pnas_0510237103_2.pdf]
